# Supplementary material
Source: publisher site journal article supplement (https://www.dovepress.com/article/240577)
Supplement: Supplementary file 1 [file get_supplementary_file.php]

**Supplementary Figure 1** The expression levels of TOP2A in 16 paired cervical cancer tissues and the adjacent normal tissues were detected by western blotting assay. (**p*<0.05) (TOP2A, Topoisomerases type IIA; N, Normal tissue; T, Tumor tissue; GAPDH, glyceraldehyde-3-phosphate dehydrogenase)

**
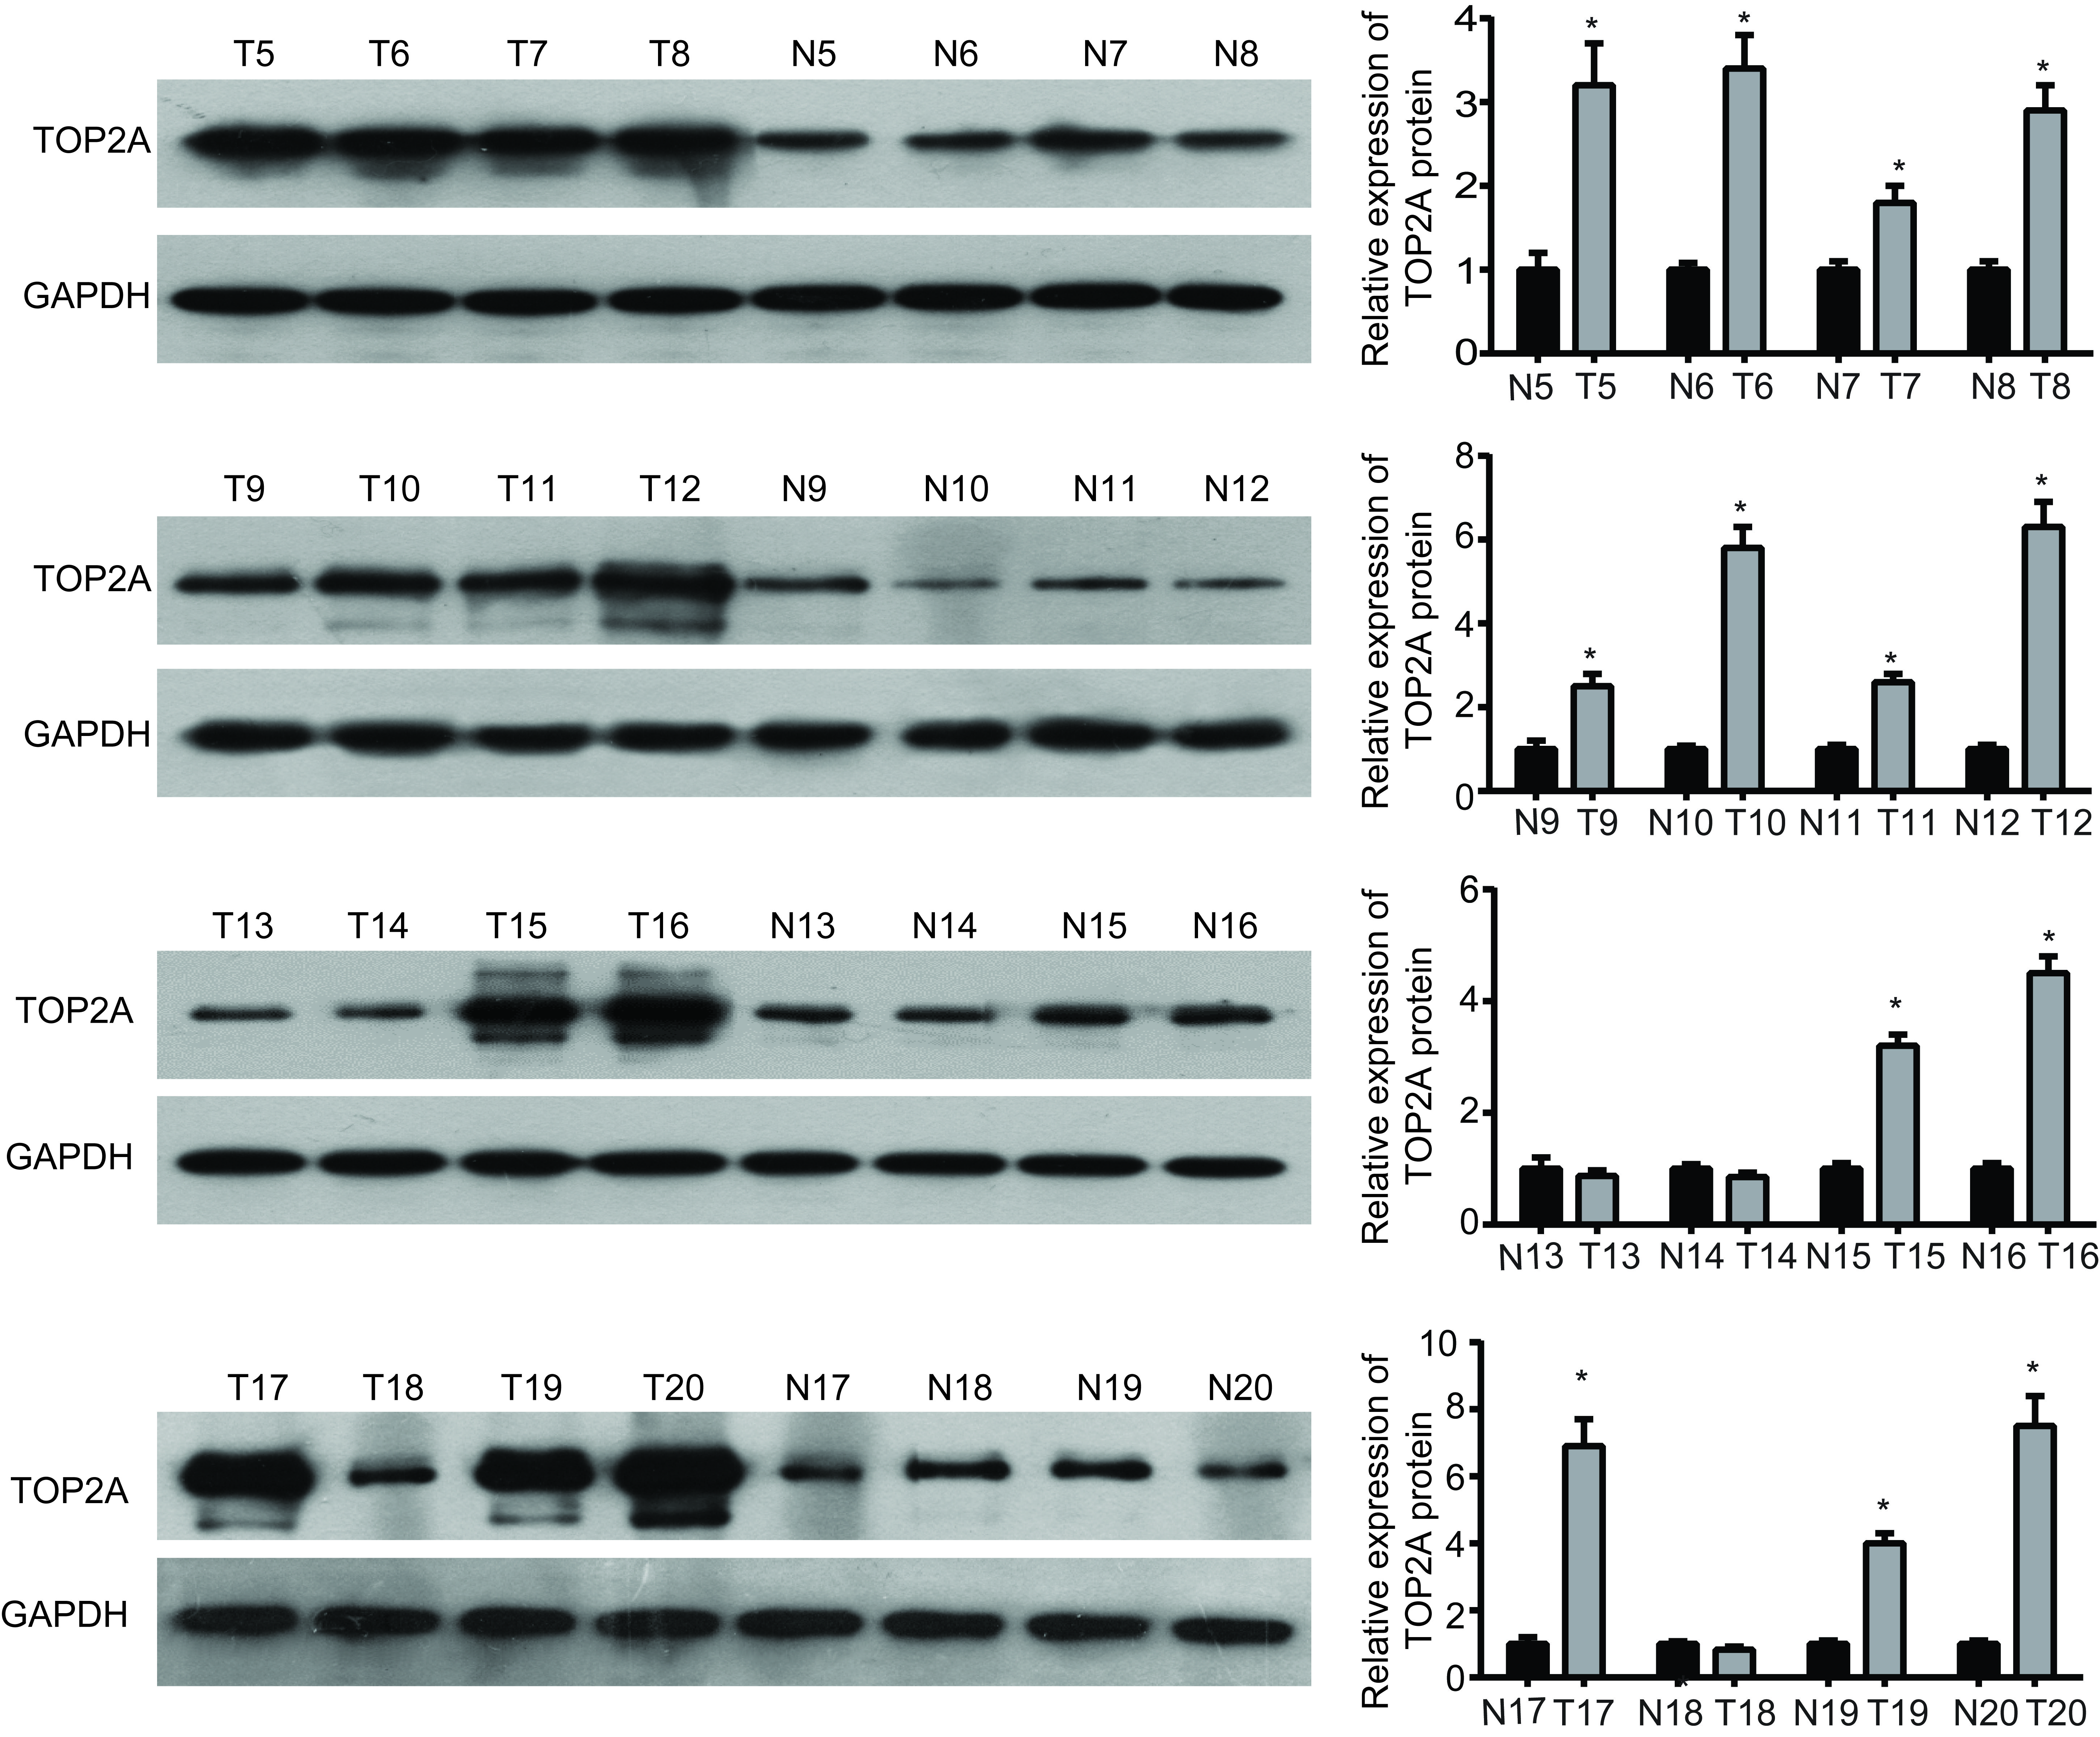
**
